# Supplementary material for: Preferential segregation of gold at the symmetrical tilt grain boundaries of platinum: an atomic-scale quantitative understanding
Source: Royal Society of Chemistry journal article supplement (doi:10.1039/d4cp00633j), 2024-01-01
Supplement: d4cp00633j1.pdf [file d4cp00633j1.pdf]

## Supplementary Materials:

# Preferential Segregation of Gold at Symmetrical Tilt Grain Boundaries of Platinum: An Atomic-Scale Quantitative Understanding

Xianxian Zhang,<sup>a</sup> Jianfeng Tang,<sup>\*a</sup> Xingming Zhang,<sup>a</sup> Liang Wang,<sup>a,b</sup> Dingwang Yuan,<sup>c</sup>

Huiqiu Deng,<sup>c</sup> and Lei Deng<sup>\*a</sup>

<sup>a</sup> *School of Chemistry and Material Science, Hunan Agricultural University, Changsha  
410128, China.*

<sup>b</sup> *The Peac Institute of Multiscale Sciences, Chengdu 610207, China*

<sup>c</sup> *College of Materials Science and Engineering, Hunan University, Changsha 410082, China*

<sup>d</sup> *School of Physics and Electronics, Hunan University, Changsha 410082, China*

\* Corresponding Authors

Email: [jftang@hunau.edu.cn](mailto:jftang@hunau.edu.cn) (J. F. Tang), [lei0736@gmail.com](mailto:lei0736@gmail.com) (L. Deng)

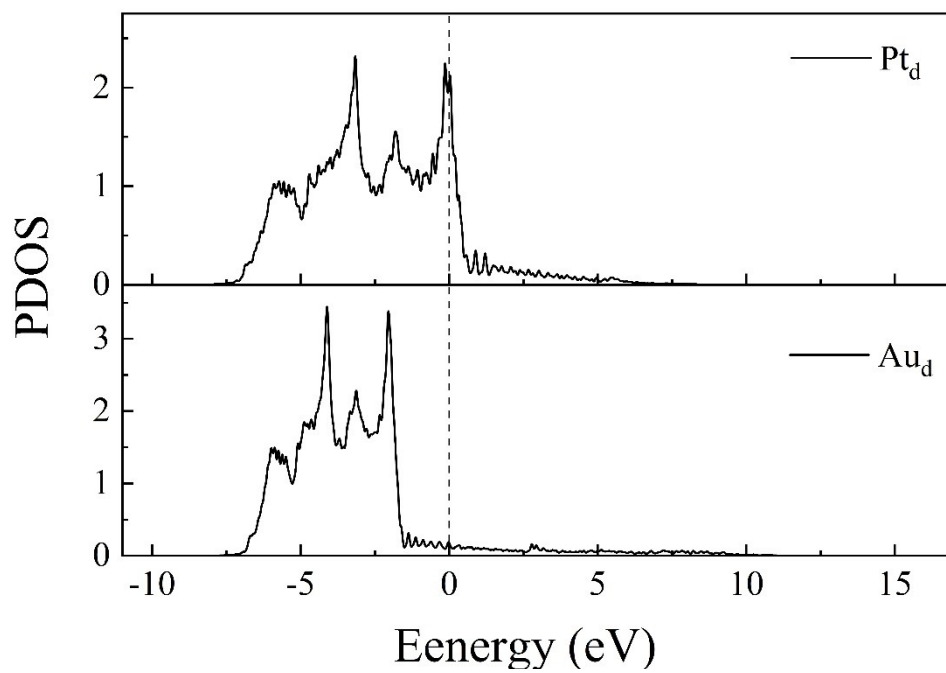

Fig. S1 PDOS diagram of d-band for Pt and Au.

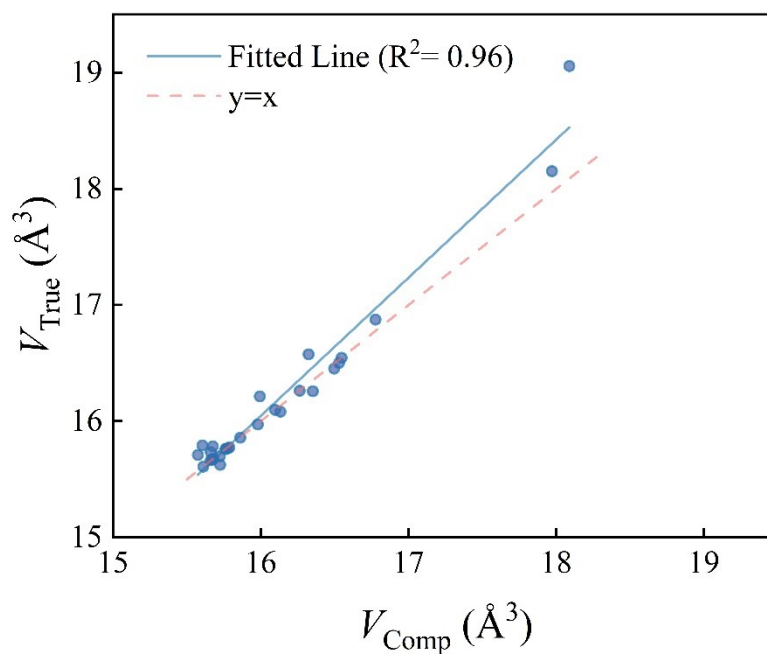

Fig. S2 Comparison between the true atom Voronoi volume and compute values based on Eq. 8.

Utilizing the average bond length rather than specific bond length for volume calculation results in

$V_{\text{Comp}} < V_{\text{True}}$ , with a slope exceeding 1.
